# Supplementary material
Source: publisher figshare collection journal article supplement (https://gsapubs.figshare.com/ndownloader/files/23318069)
Supplement: Supplementary file 1 [file 23318069]

## Sheet: Table A5
TABLE A5. PALYNOMORPH CATEGORIES FOR NMDS ORDINATION
ALETE POLLEN/ SPORES	POLLEN						SPORES										PHYTOPLANKTON	FUNGI
	COSTATE + POLYPLICATE	MONOCOLPATE	BISACCATE		MONOSACCATE		MONOLETE		TRILETE
			NON-TAENIATE	TAENIATE	NON-TAENIATE	TAENIATE	ZONATE	OTHER	AZONATE							ZONATE
									COARSE BACULATE	CINGULATE	ECHINATE	GRANULATE	LAEVIGATE	VERRUCATE	OTHER
1. All alete pollen/ spores	2. All costate and polyplicate	3. All monocolpate	4. Vitreisporites spp.	6. Lunatisporites pellucidus	8. All non-taeniate monosaccate pollen	9. All taeniate monosaccate pollen	10. All zonate monolete spores (= Aratrisporites spp.)	11. Thymospora spp.	12. All coarse baculate	13. Limatulasporites spp.	15. Brevitriletes bulliensis	17. All granulate	18. All laevigate	19. All verrucate	20. Triplexisporites playfordii	23. Lundbladispora sp. A	28. All phytoplankton	29. All fungi
			5. Other non-taeniate bisaccate pollen	7. Other taeniate bisaccate pollen						14. Other cingulate trilete spores	16. Other echinate trilete spores				21. Microbaculatispora spp.	24. Lundbladispora springsurensis
															22. ALL OTHER AZONATE TRILETE SPORES	25. Playfordiaspora crenulata
																26. Rewanispora foveolata
																27. Other zonate trilete spores
